# Supplementary material for: Miniaturized Antimicrobial Susceptibility Test by Combining Concentration Gradient Generation and Rapid Cell Culturing
Source: MDPI journal article supplement (doi:10.3390/antibiotics4040455), 2015-10-29
Supplement: s1 [file s1]

## Supplementary Materials

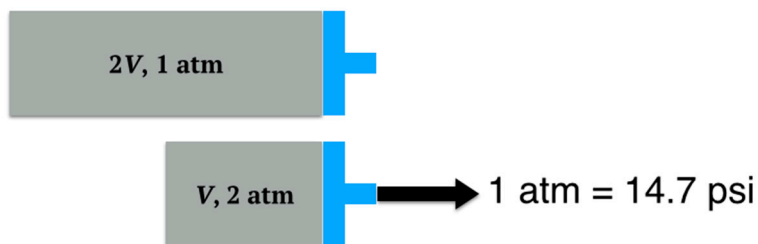

Assuming the air pressure to be  $1\text{ atm}$  ( $= 14.7\text{ psi}$ ), if  $60\text{ mL}$  of air in the syringe is compressed to  $30\text{ mL}$ , then the additional pressure onto the liquid surface will be  $14.7\text{ psi}$ .

The compression ratio to achieve 10, 20 or 30 psi injection pressure can be calculated as follows:

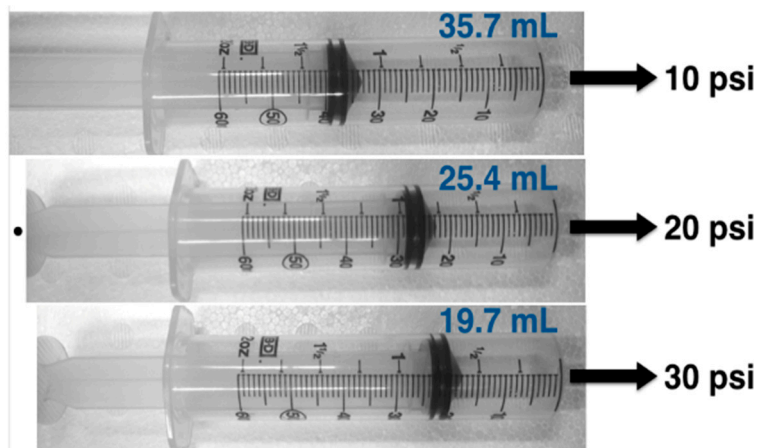

For  $x\text{ psi}$  extra pressure, final pressure should be  $(x + 14.7)\text{ psi}$ . Using Boyle's law ( $PV = \text{constant}$ ),

$$(14.7)(V_0) = (x + 14.7)(V_1)$$

$$V_1 / V_0 = 14.7 / (x + 14.7)$$

For  $V_0 = 60\text{ mL}$ ,

$x = 10\text{ psi}$ ,  $V_1 = 35.7\text{ mL}$

$x = 20\text{ psi}$ ,  $V_1 = 25.4\text{ mL}$

$x = 30\text{ psi}$ ,  $V_1 = 19.7\text{ mL}$

**Figure S1.** Compression injection via 60-mL syringe.

(a) Ampicillin

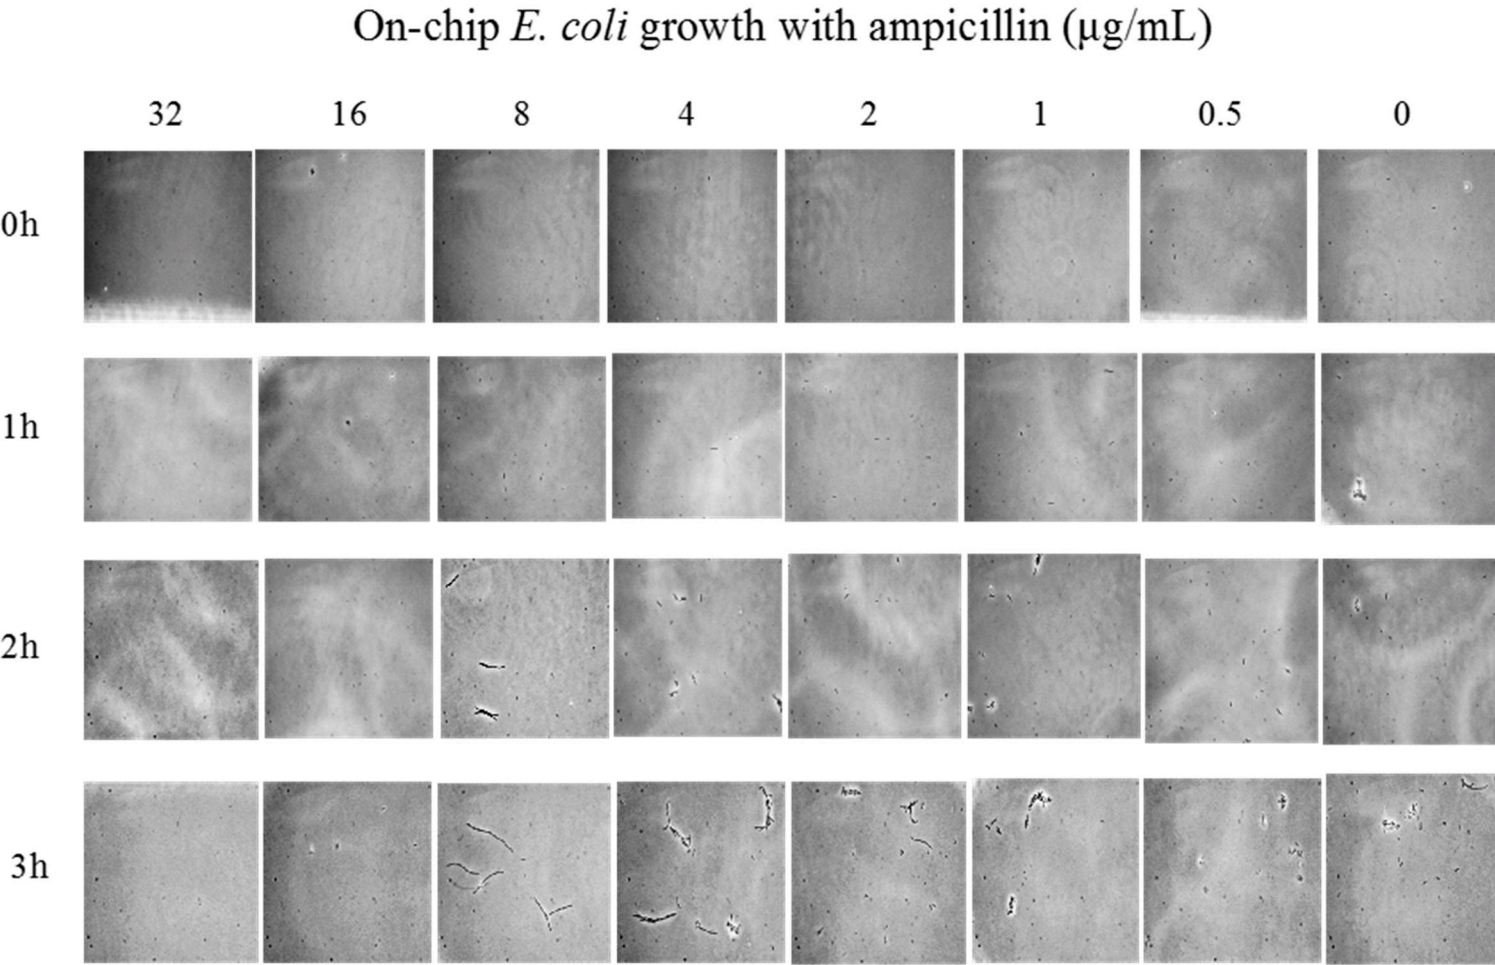

Figure S2. Cont.

(b) Streptomycin

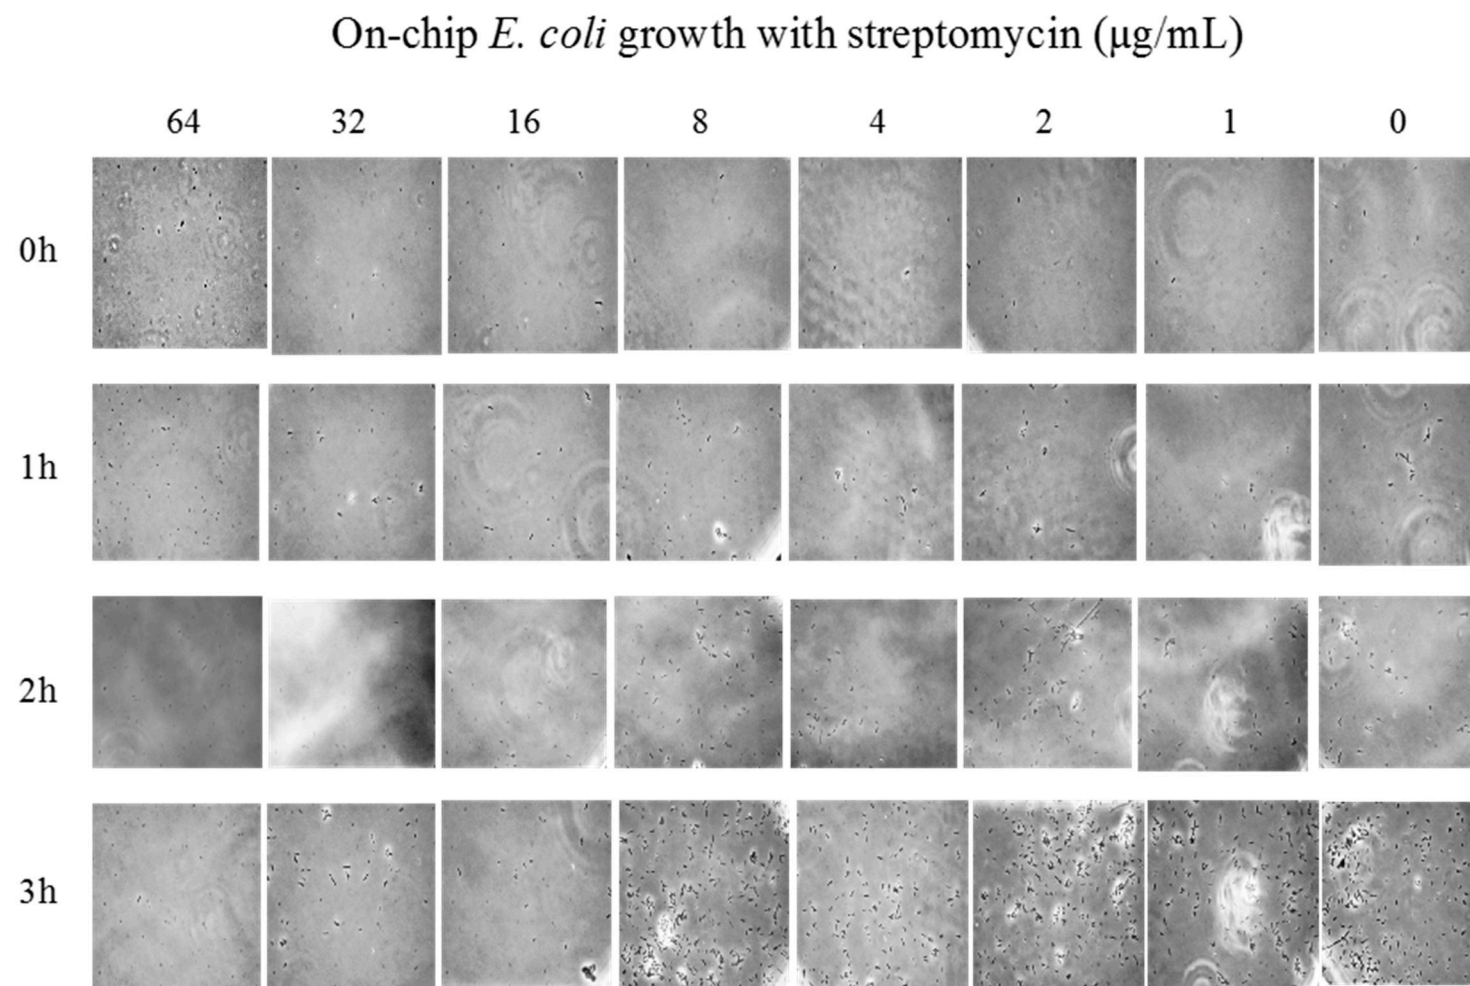

**Figure S2.** Microscope images of *E. coli* growth within microchambers.

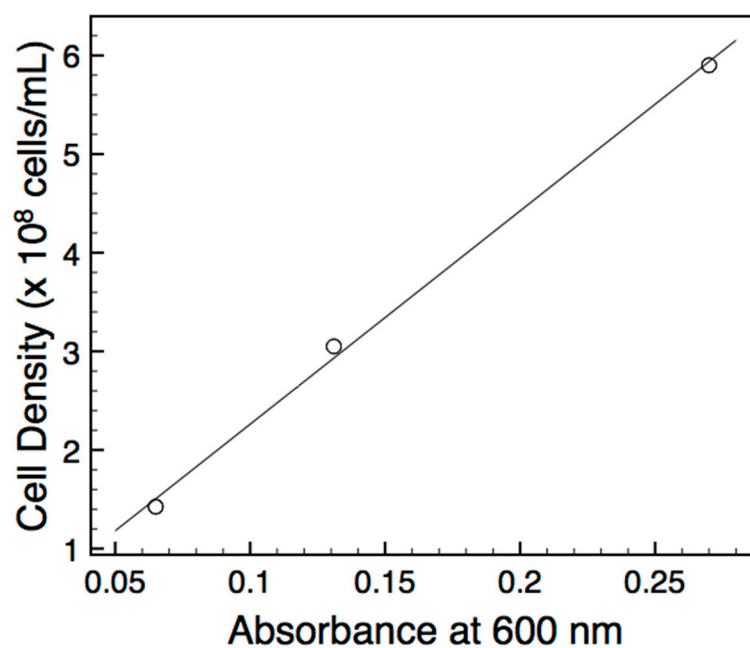

**Figure S3.** Relationship between absorbance at 600 nm and cell density. Cell density for each sample was determined using a hemocytometer. Linear regression analysis resulted in:  $y = 21.625x + 0.099$  ( $R^2 = 0.998$ ) as shown by the line.

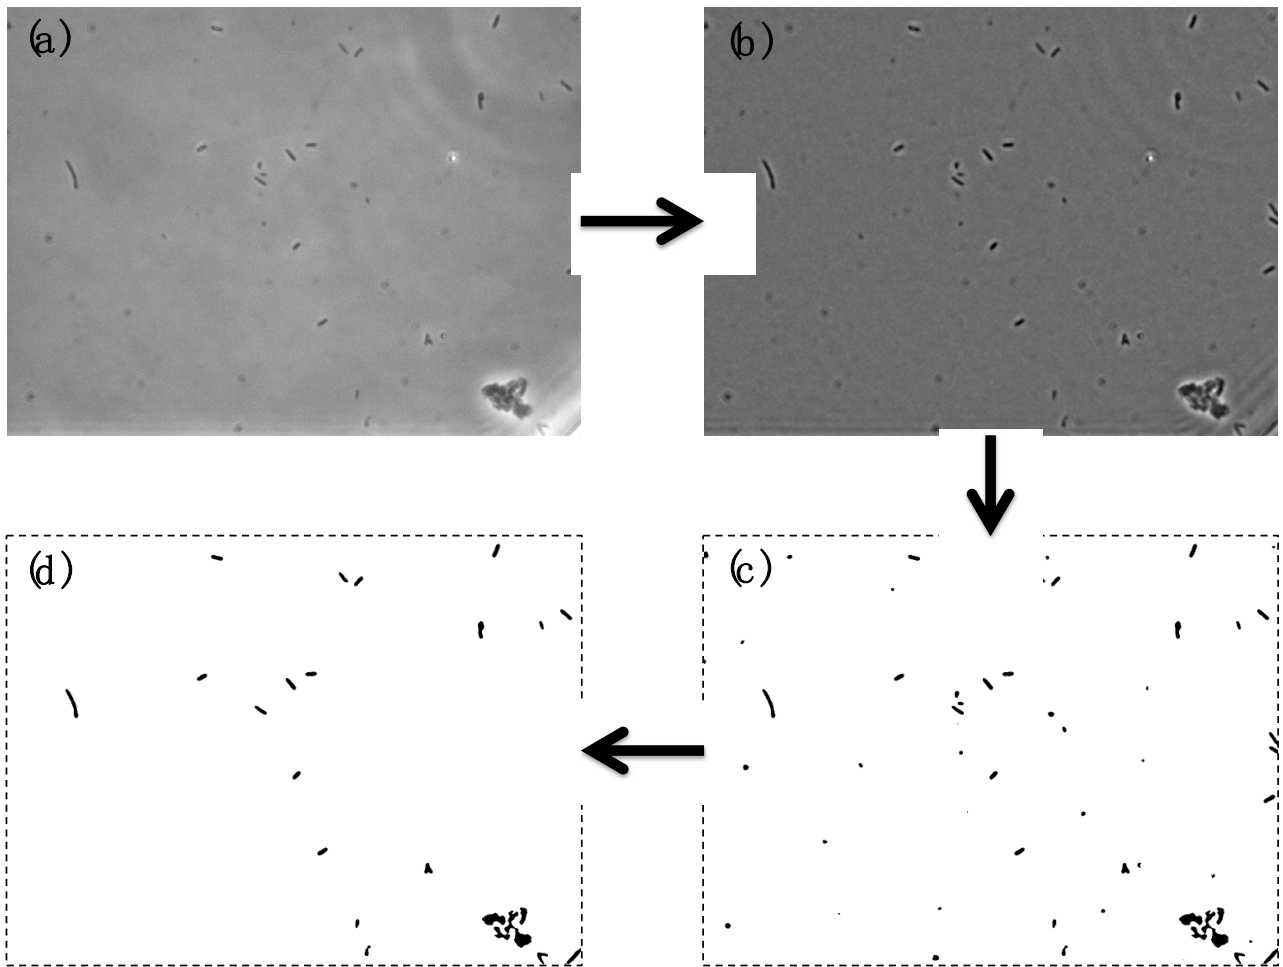

**Figure S4.** Image Processing for Microscopic Images of Cells: (a) raw image, (b) FFT bandpass filtered image, (c) IsoData thresholded image and (d) Size/Circularity-filtered image.
